# Supplementary material
Source: HighWire-hosted journal article supplement (https://jnm.snmjournals.org/highwire/filestream/94353/field_highwire_adjunct_files/0/101394_Supplemental_Data.pdf)
Supplement: 101394_Supplemental_Data.pdf [file 101394_Supplemental_Data.pdf]

**Supplemental Table 1. Myocardial uptake of <sup>18</sup>F-FDG on PET scan**

|                                  |                | Ex8                    |                                           | Ex48                   |                                           | NoEx<br>(N=34) |
|----------------------------------|----------------|------------------------|-------------------------------------------|------------------------|-------------------------------------------|----------------|
|                                  |                | All patients<br>(N=48) | Patients with<br>ischemia on<br>MPI (N=4) | All patients<br>(N=45) | Patients with<br>ischemia on<br>MPI (N=7) |                |
| <b>Myocardial uptake pattern</b> | <b>Diffuse</b> | 12                     | 2                                         | 10                     | 2                                         | 15             |
|                                  | <b>Focal</b>   | 13                     | 2                                         | 16                     | 2                                         | 9              |
|                                  | <b>None</b>    | 23                     | 0                                         | 19                     | 3                                         | 10             |
